# Supplementary material
Source: PubMed Central journal article supplement (PMC6939632)
Supplement: NIHMS1545189-supplement-1.pdf [file NIHMS1545189-supplement-1.pdf]

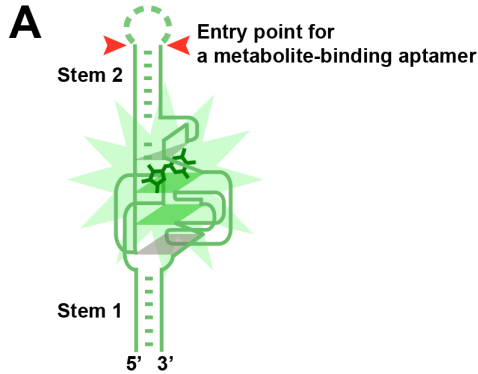

Spinach / Broccoli - DFHBI-1T green fluorescent complex

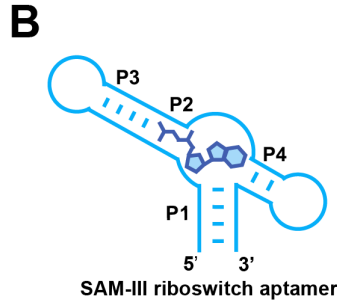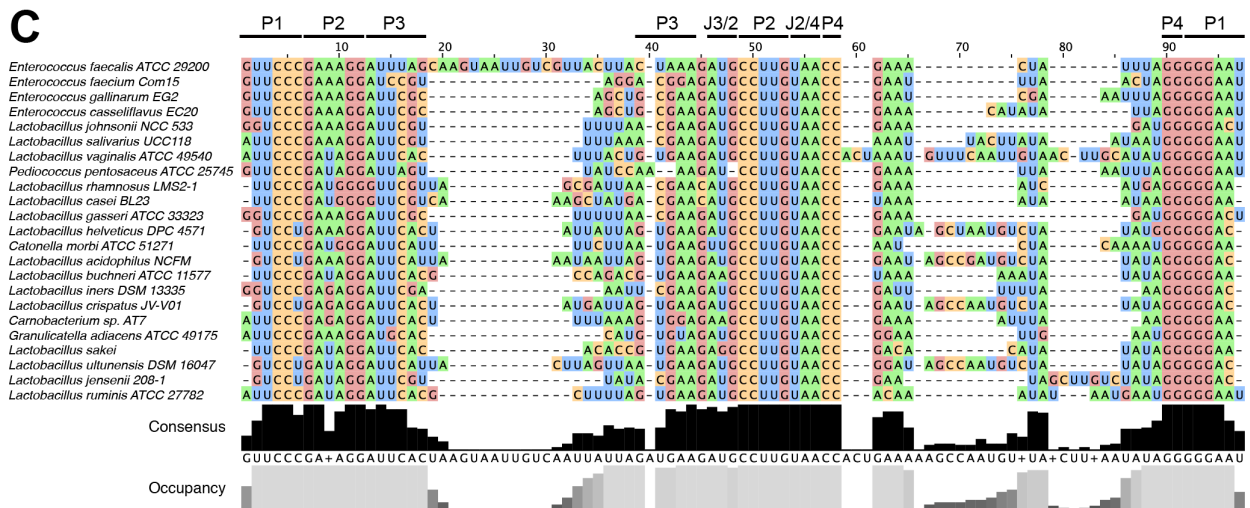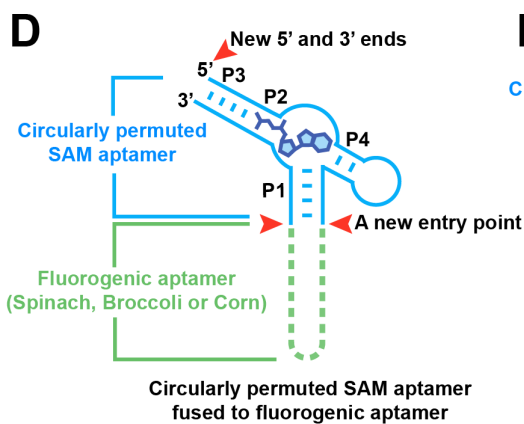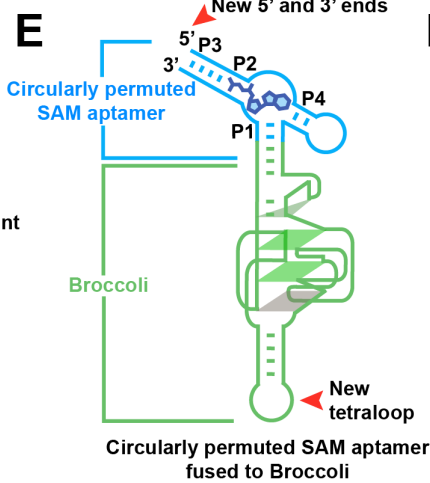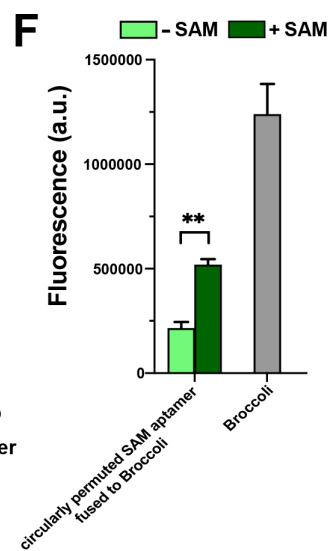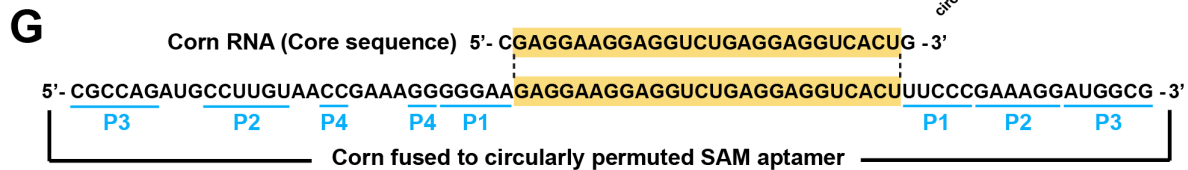

**Figure S1, related to Figure 1. Circularly permuted SAM aptamer creates an entry point for a fluorogenic aptamer**

(A) Schematic representation of the Spinach structure shows an entry point for a metabolite binding aptamer. Spinach contains two helical stems (Stem 1 and Stem 2, indicated). The cognate fluorophore DFHBI-1T (Song et al., 2014) binds between the top G-quadruplex (green parallelogram) and a base-triple (grey triangle). Stem 2 above the base triple provides an entry point for metabolite-binding aptamers, which have been used to generate Spinach-based metabolite sensors. The principles shown here also apply to the Broccoli aptamer, which has a very similar fluorophore-binding domain (Filonov et al., 2019). The transparent grey parallelogram indicates a mixed-sequence tetrad.

(B) Schematic representation of the SAM-III riboswitch aptamer structure in complex with SAM (Lu et al., 2008).

(C) Phylogenetic sequence alignment of the SAM-III riboswitch aptamer RNA (Appasamy et al., 2013; Fuchs et al., 2006). The sequences of the P3 stem adjacent to the loop region do not show high conservation across different prokaryotic cell species.

(D) Schematic diagram of circularly permuted SAM aptamer fused to a fluorogenic aptamer. Circularly permuted SAM aptamer contains new 5' and 3' ends at the end of P3 stem, instead of the P1 stem. This creates a new entry point in the P1 stem for inserting a fluorogenic aptamer such as Spinach, Broccoli or Corn.

(E) To test whether the circularly permuted SAM aptamer is functional, we fused this newly engineered SAM aptamer to Broccoli. The schematic diagram shows that the P1 stem of the circularly permuted SAM aptamer fused to the Broccoli stem. Also shown are the 5' and 3' ends introduced into the P3 stem of the circularly permuted SAM aptamer.

(F) Fluorescence measurements for the circularly permuted SAM aptamer-Broccoli fusion RNA in the absence or presence of SAM. The fluorescence signal of 1  $\mu\text{M}$  *in vitro* transcribed fusion RNA was measured at 37°C after the addition of vehicle (water) or 0.1 mM SAM in buffer containing 40 mM K-HEPES (pH 7.5), 100 mM KCl, 1 mM  $\text{MgCl}_2$  and 10  $\mu\text{M}$  DFHBI-1T. (excitation 470 nm; emission 505 nm). The mean and SEM values are shown ( $n = 3$ ). \*\*  $P = 0.0021$

(G) The core sequence of Corn and the sequence of Corn fused to the circularly permuted SAM aptamer. Each helical stem of the SAM aptamer is denoted on the sequence of the fusion RNA (below).

**A**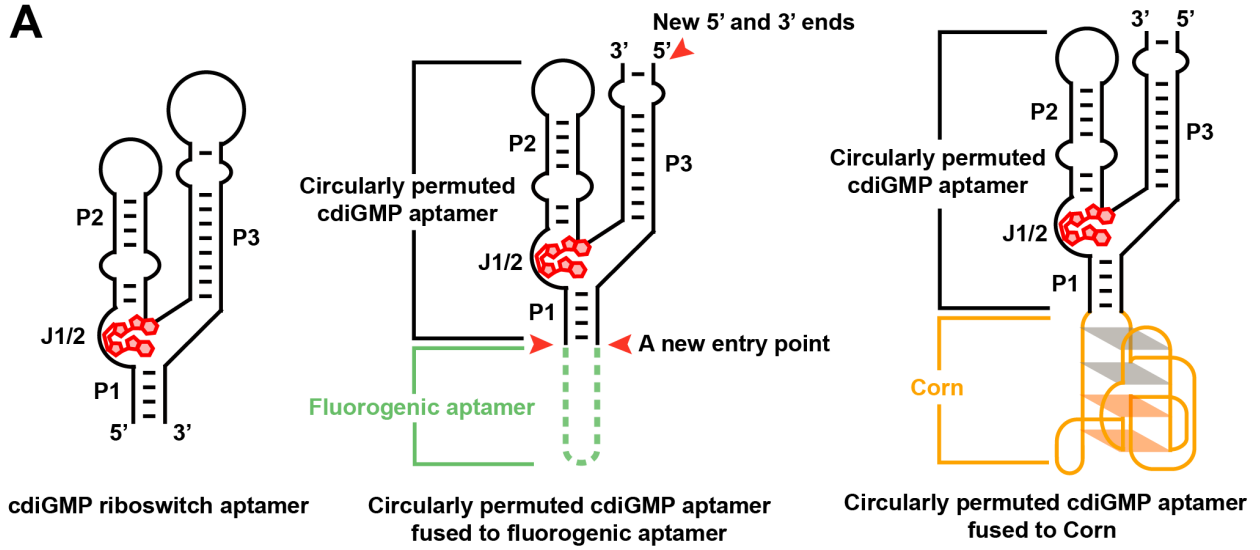**B**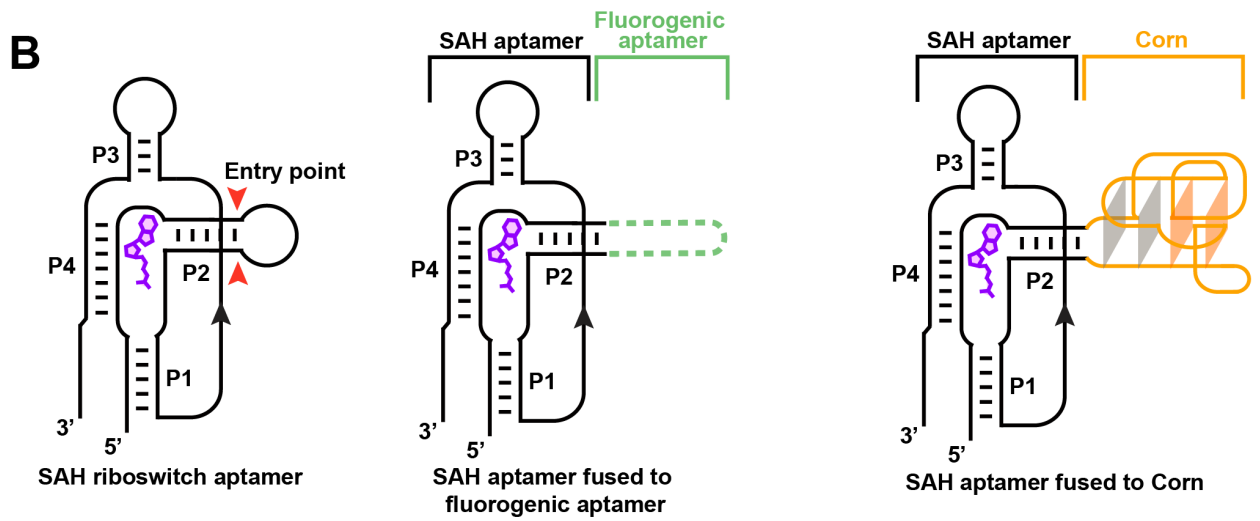**C**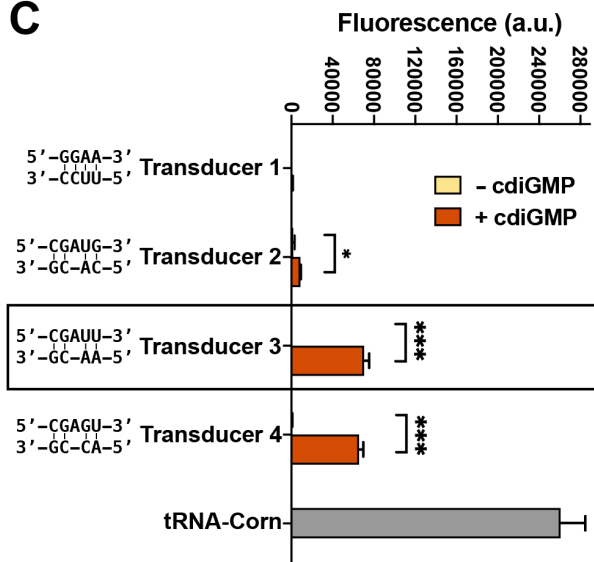**D**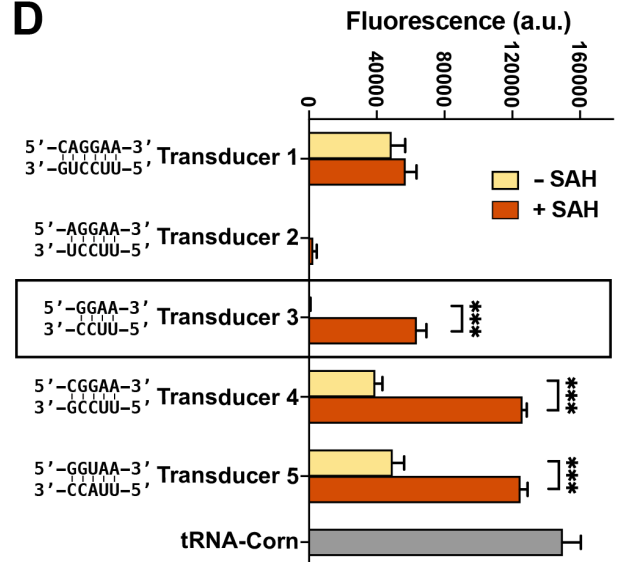

**Figure S2, related to Figure 2. Design of a Corn-cdiGMP sensor and a Corn-SAH sensor.**

(A) Schematic diagram of designing a Corn-cdiGMP sensor. Circularly permuted cdiGMP aptamer contains new 5' and 3' ends at the end of the P3 stem, instead of the P1 stem. This creates a new entry point in the P1 stem for inserting a fluorogenic aptamer such as Spinach, Broccoli or Corn. We fused this newly engineered cdiGMP aptamer to Corn.

(B) Schematic diagram of a Corn-SAH sensor. The SAH aptamer contains an entry point in the P2 stem for inserting a fluorogenic aptamer such as Spinach, Broccoli or Corn. Thus, Corn was fused to the P2 stem on the SAH aptamer.

(C) Optimization of cdiGMP-Corn sensor transducer sequences. Four different transducer sequences were tested for their ability to mediate cdiGMP-induced fluorescence. In each case, *in vitro* transcribed Corn-SAM sensor RNA (1  $\mu$ M) was incubated with 10  $\mu$ M DFHO and 0.1 mM cdiGMP in buffer containing 40 mM K-HEPES (pH 7.5), 100 mM KCl and 3 mM MgCl<sub>2</sub>. After 1 h incubation at 37°C, the fluorescence of each sample was measured (excitation 505 nm; emission 545 nm). The optimal transducer (transducer 3), based on signal-to-noise ratio, is indicated in a black-lined box. The mean and SEM values are shown in the plot (n = 3). \* P = 0.0116 (Transducer 2), \*\*\* P = 0.0002 (Transducer 3), \*\*\* P = 0.0001 (Transducer 4)

(D) Optimization of SAH-Corn sensor transducer sequences. Five different transducer sequences were tested for their ability to mediate SAH-induced fluorescence. In each case, *in vitro* transcribed Corn-SAM sensor RNA (1  $\mu$ M) was incubated with 10  $\mu$ M DFHO and 0.1 mM SAH in buffer containing 40 mM K-HEPES (pH 7.5), 100 mM KCl and 0.5 mM MgCl<sub>2</sub>. After 1 h incubation at 37°C, the fluorescence of each sample was measured (excitation 505 nm; emission 545 nm). The optimal transducer (transducer 3), based on signal-to-noise ratio, is indicated in a black-lined box. The mean and SEM values are shown in the plot (n = 3). \*\*\* P = 0.0004 (Transducer 3), \*\*\* P < 0.0001 (Transducer 4), \*\*\* P = 0.0008 (Transducer 5)

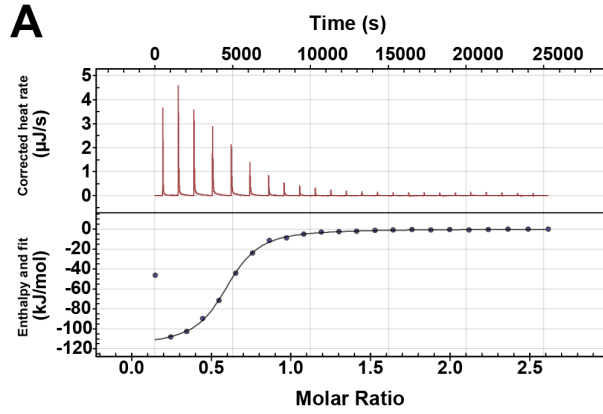

- DFHO  $K_d$  for SAM = 2.0  $\mu$ M

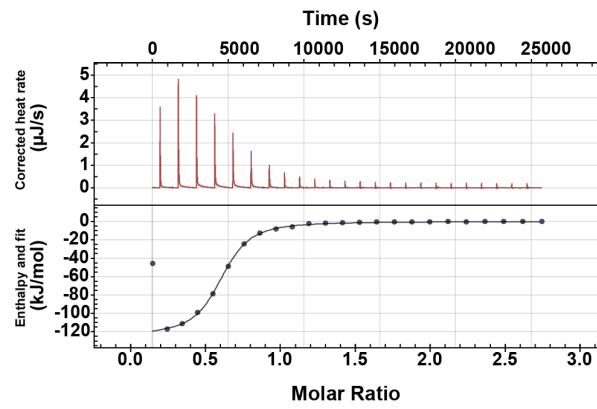

+ DFHO  $K_d$  for SAM = 1.7  $\mu$ M

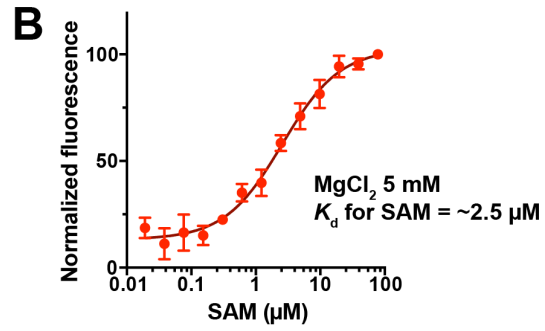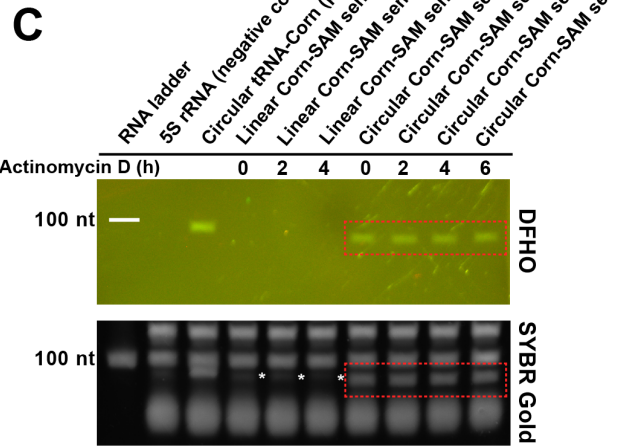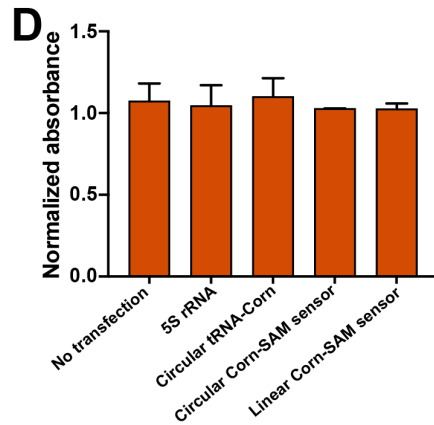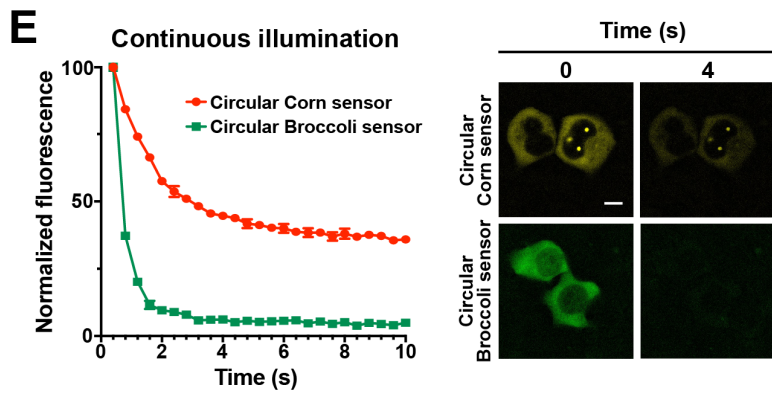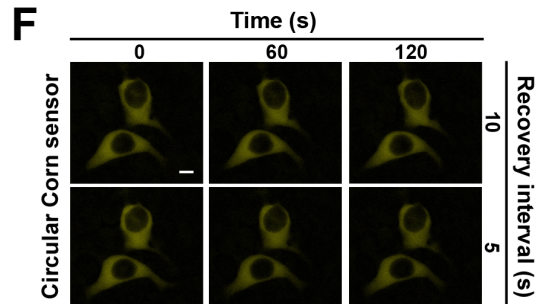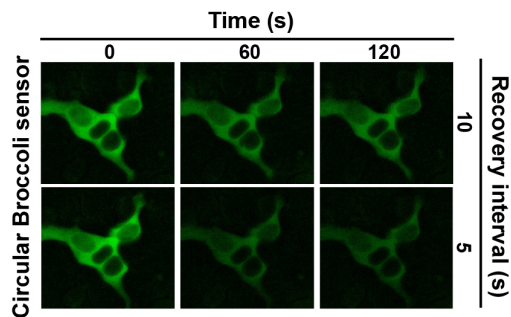

**Figure S3, related to Figures 3 and 4. Circular Corn-SAM sensor expressed using the Tornado system accumulates to high concentration level in HEK293T cells and exhibits markedly improved photostability.**

(A) ITC measurements for the  $K_d$  of the Corn-SAM sensor for SAM in the presence or absence of DFHO. We measured SAM binding to the Corn-SAM sensor using a previous protocol used to study DFHO binding to Corn (Song et al., 2017). In these experiments, Corn-SAM sensor RNA solution and SAM solution were prepared in the same buffer (40 mM K-HEPES, pH 7.5, 100 mM KCl and 5 mM  $MgCl_2$ ). In ITC experiments, RNA is used at a high concentration, which required us to similarly increase the concentration of DFHO and  $MgCl_2$  in order to maintain stoichiometry with respect to the RNA. *In vitro* transcribed Corn-SAM sensor was dissolved to a final concentration  $\sim 107.5 \mu M$  in a 330  $\mu L$  solution. In the condition where DFHO was present, 400  $\mu M$  DFHO was included in the final RNA solution (final concentration of DMSO was 0.56%). The RNA solution was loaded in the cell of a Nano ITC microcalorimetry device (TA Instruments) and 50  $\mu L$  of 877  $\mu M$  SAM was loaded in the titration syringe. For the condition where DFHO was present, 0.56% DMSO was included in the final SAM solution. Measurements were performed at 37°C and the syringe rotation speed was set to 250 rpm. Data were fit with using the “independent model” setting in NanoAnalyze software (TA Instruments). The concentration of Corn-SAM sensor RNA was determined using denaturing PAGE analysis followed by SYBR Gold staining and comparing SYBR Gold signal with RNA standards (Thermo Fisher Scientific SM1831).

(B) Dose-response curve for fluorescence activation of the Corn-SAM sensor by SAM. In the ITC experiment, more  $MgCl_2$  is used due to the high concentration of RNA. We therefore measured the SAM  $EC_{50}$  using high (i.e. 5 mM)  $MgCl_2$  conditions for comparison with the ITC results shown in panel A. For these experiments, *in vitro* transcribed Corn-SAM sensor RNA (0.1  $\mu M$ ) was incubated with each indicated concentration of SAM and 10  $\mu M$  DFHO at 37°C in a buffer containing 40 mM K-HEPES (pH 7.5), 100 mM KCl and 5 mM  $MgCl_2$ . Half-maximal fluorescence is reached at  $\sim 2.5 \mu M$ . This value is comparable to the  $K_d$  value obtained from ITC shown in panel A. The Hill coefficient calculated using GraphPad Prism was  $\sim 1$ . The mean and SEM values are shown (n = 3).

(C) Denaturing PAGE analysis of whole cellular RNA harvested from cells expressing different RNA constructs. To confirm expression of the circular Corn-SAM sensor and its long half-life, we harvested total cellular RNA from cells treated with actinomycin D for the indicated time and analyzed the RNA by denaturing PAGE. HEK293T cells were transfected with a plasmid expressing the linear Corn-SAM sensor or a plasmid expressing the circular Corn-SAM sensor. 2 d after transfection, cells were treated with 5  $\mu g/ml$  actinomycin D for the indicated time to inhibit RNA polymerase activity, and thus measure RNA stability. Total cellular RNA was harvested by using TRIzol LS. Cellular RNA (1.5  $\mu g$ ) was loaded in each lane of a 6% TBE-Urea PAGE gel. After PAGE, the gel was washed three times for 5 min each with water to remove urea from the gel. Then, the gel was first stained with 10  $\mu M$  DFHO and 0.1 mM SAM (top), followed by a counterstaining with SYBR Gold (bottom). The DFHO stained gel was imaged using a ChemiDoc Imaging station (BioRad) at the green channel (excitation 470/30 nm; emission 530/28 nm) and red channel (excitation 530/28 nm; emission 605/50 nm). The image shown here is the overlay of both scans. The SYBR Gold stained gel was imaged using standard imaging settings (excitation 302 nm; emission 590/110 nm).

Red dotted boxes indicate circular Corn-SAM sensor RNA. Unlike the circular form of the sensor, which was readily detected on the DFHO-stained denaturing PAGE gel, the linear form

of the sensor was not detected. Notably, treatment of cells with actinomycin D for 6 h, which typically causes a complete loss of linear aptamers due to their instability, did not affect the expression level of the circular Corn-based sensor. This is expected for circular RNA. White asterisks on the SYBR Gold stained gel indicate the faint linear Corn-SAM sensor RNA.

(D) Cells were assayed for viability and proliferation with MTT. Cells were transfected with plasmids expressing the indicated RNA constructs. Cells were subcultured onto mouse laminin-coated plates 1 d after transfection. 3 d after transfection, cells were incubated with 2.5 mg/mL MTT. After 3 h incubation at 37°C, cells were lysed. MTT absorbance readings were performed at 590 nm absorbance. Signal obtained from MTT solution without cells was used for subtracting background. Values were normalized to the average value of the no transfection condition.

(E) Photostability analysis of the circular Corn-SAM sensor and the circular Broccoli-SAM sensor with continuous illumination. In **Figures 4, S3F and S4**, we used pulsed illumination, which reduces photobleaching. Here we used a continuous illumination protocol. To test if the Corn-SAM sensor exhibits improved photostability compared to the Broccoli-SAM sensor, we imaged cells expressing the circular Corn-SAM sensor or the circular Broccoli-SAM sensor (Litke and Jaffrey, 2019). Cell images were acquired for 10 s using a 400 ms acquisition time. The cells were continuously illuminated throughout the experiment. Cellular mean fluorescence intensity was calculated (See **Methods**), and normalized to maximum intensity at time point 400 ms (100) and background intensity (0). The normalized values of cell mean fluorescence intensity were plotted against time. The average values of mean fluorescence intensity and SEM calculated from cells in independently acquired images are shown on the plot ( $n = 3$ ). Representative images are shown. The filter set used for Broccoli fluorescence detection was a filter cube with excitation filter  $470 \pm 20$  nm, dichroic mirror 495 nm (long pass), and emission filter  $525 \pm 25$  nm. Corn fluorescence detection used a filter cube with excitation filter  $500 \pm 12$  nm, dichroic mirror 520 nm (long pass), and emission filter  $542 \pm 13.5$  nm. Scale bar 10  $\mu\text{m}$ . NA 0.75.

(F) Photostability analysis of the circular Corn-SAM sensor and the circular Broccoli-SAM sensor with pulsed illumination. We examined if fluorescence intensity in single cells expressing the Corn-SAM sensor or the Broccoli-SAM sensor photobleaches during the short time-course imaging experiment. Cell images were acquired with a 1000-ms acquisition time. A recovery interval (i.e. shutter closed, and no light was applied to samples) was either 10 s or 5 s, as indicated. The fluorescence intensity in cells expressing the Broccoli-SAM sensor exhibited substantially more photobleaching compared to Corn-SAM sensor expressing cells (See **Figure 4B**). Scale bar 10  $\mu\text{m}$ . NA 0.75.

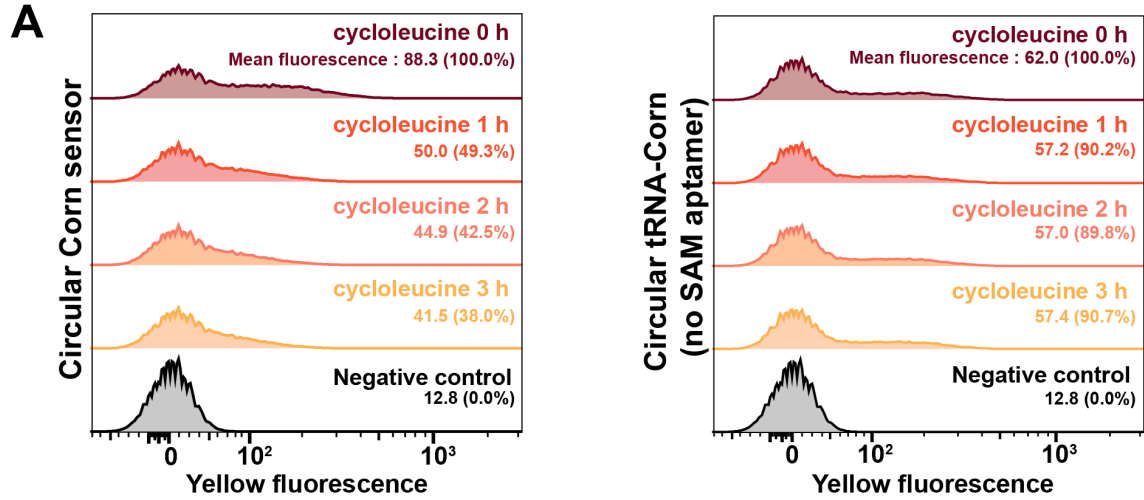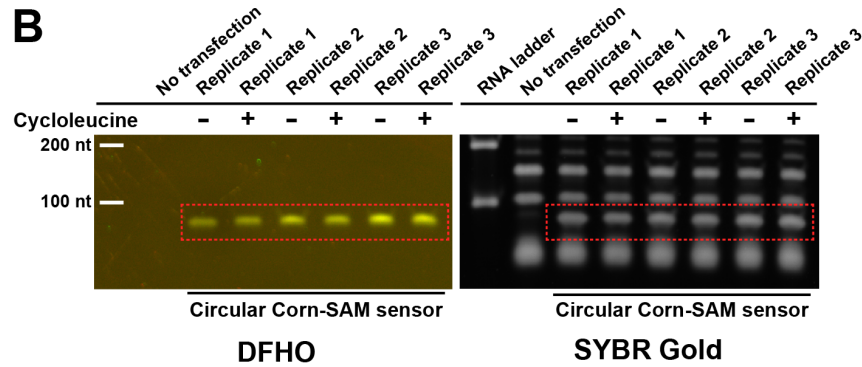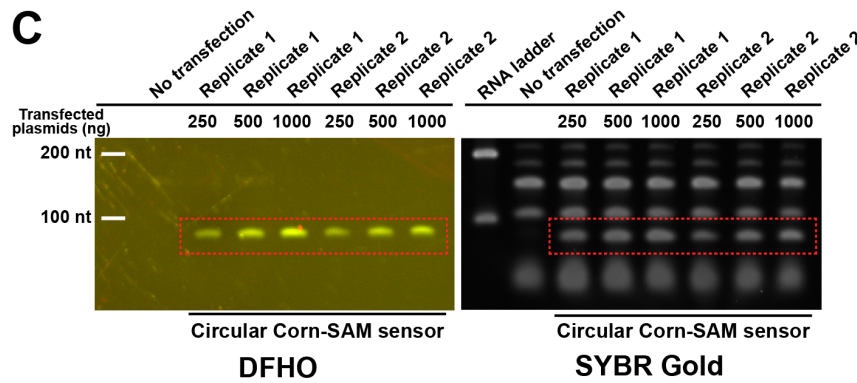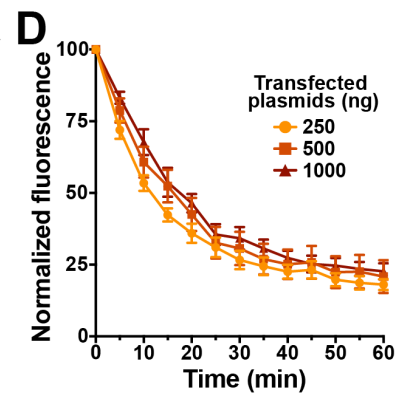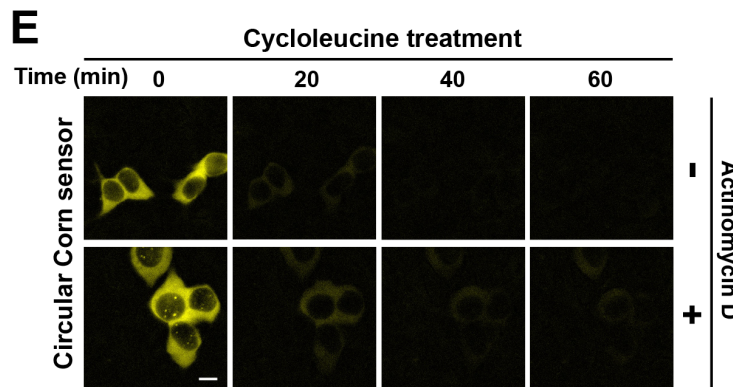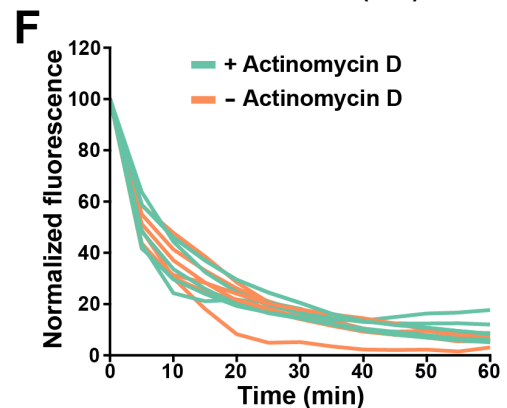



**Figure S4, related to Figure 4. Changes in Corn fluorescence reflect SAM dynamics in living cells.**

(A) Flow cytometry analysis of cells expressing the circular Corn-SAM sensor after cycloleucine treatment, which inhibits SAM biosynthesis. HEK293T cells were transfected with plasmids expressing the circular Corn-SAM sensor. As a control for the cycloleucine response, cells expressing the circular tRNA-Corn were analyzed. Cells were subcultured onto mouse laminin-coated plates 1 d after transfection. 2 d after transfection, we treated cells with 25 mM cycloleucine for the indicated time. Yellow fluorescence was collected (excitation 488 nm; emission  $545 \pm 17.5$  nm). Cells expressing 5S rRNA were used to establish cellular autofluorescence. Both U6 promoter for the circular Corn-based constructs transcription and 5S promoter for 5S rRNA transcription recruit RNA polymerase III (White, 2004). The number of cells were plotted as a histogram against the yellow fluorescence signal intensity. Mean fluorescence values are shown.

(B) Denaturing PAGE analysis of whole cellular RNA harvested from cells treated with cycloleucine and control cells. HEK293T cells were transfected with a plasmid expressing the circular Corn-SAM sensor. 3 d after transfection, cells were treated with 25 mM cycloleucine for 1 h. Total cellular RNA was harvested by using TRIzol LS. Cellular RNA (1.5  $\mu$ g) was loaded in each lane of a 6% TBE-Urea PAGE gel. After PAGE, the gel was washed three times for 5 min each with water to remove urea from the gel. Then, the gel was first stained with 10  $\mu$ M DFHO and 0.1 mM SAM (left), followed by a counterstaining with SYBR Gold (right). The DFHO stained gel was imaged using a ChemiDoc Imaging station (BioRad) at the green channel (excitation 470/30 nm; emission 530/28 nm) and red channel (excitation 530/28 nm; emission 605/50 nm). The image shown here is the overlay of both scans. The SYBR Gold stained gel was imaged using standard imaging settings (excitation 302 nm; emission 590/110 nm).

Red dotted boxes indicate circular Corn-SAM sensor RNA. Three replicates are shown on the gel images. No overall change in total Corn-SAM sensor RNA levels was detected after the cycloleucine addition in any of the replicates.

(C) Denaturing PAGE analysis of whole cellular RNA harvested from cells transfected with different amount of the Corn-SAM sensor-expressing plasmid. HEK293T cells were transfected with 250 ng, 500 ng (the amount used elsewhere throughout this study) or 1000 ng of a plasmid expressing the circular Corn-SAM sensor. 3.5 d after transfection, total cellular RNA was harvested by using TRIzol LS. Cellular RNA (1.5  $\mu$ g) was resolved on 6% TBE-Urea PAGE gel and stained as described in panel B.

Red dotted boxes indicate circular Corn-SAM sensor RNA. Higher level of circular Corn-SAM sensor RNA was detected when a larger amount of a plasmid was transfected.

(D) To test the effect of Corn-SAM sensor RNA concentration in cells, HEK293T cells were transfected with 250 ng, 500 ng, 1000 ng of a plasmid expressing the circular Corn-SAM sensor as described in panel C. 3.5 d after transfection, we imaged cells for 1 h after addition of 25 mM cycloleucine. Cellular mean fluorescence intensity was calculated (See **Methods**), and normalized to maximum intensity at time 0 (100) and background intensity (0). The average values of mean fluorescence intensity calculated from  $n = 8$  cells (from 5 fields of view) were plotted as dots against time. Error bars indicate SEM values.

In cells expressing the highest levels of the Corn-SAM sensor RNA, the rate of fluorescence loss after cycloleucine treatment was slower compared to cells expressing the lowest levels of

sensor RNA (time to half-maximal fluorescence was increased by ~6 min). Thus, the expression levels should be consistent in different experiments when comparing rates of fluorescence change using this sensor.

(E) Single-cell imaging of the circular Corn-SAM sensor fluorescence in response to cycloleucine and actinomycin D treatment. HEK293T cells were transfected with plasmids expressing the circular Corn-SAM sensor. After 4 d, we imaged cells for 1 h after addition of 25 mM cycloleucine and 5 µg/mL actinomycin D. As a control, cells were incubated with 25 mM cycloleucine only. Images were acquired using a 40× air objective (NA 0.75) and YFP filter cube (ex 500 ± 12 nm; em 542 ± 13.5 nm). Acquisition time 500 ms. Scale bar 10 µm.

(F) SAM trajectory plots of 5 individual cells for each condition selected from 2 biological replicates. Each trajectory plot was generated based on the mean fluorescence intensity in single cells during the time-course imaging experiment. In case of each cell, mean fluorescence intensities were calculated at 13 time points over a 1 h imaging experiment (See **Methods**). Actinomycin D did not induce any noticeable change in the decrease rates of Corn-SAM sensor signal.

**Table S1, related to Figures 4A and S3C. Full length RNA sequences of the linear Corn-SAM sensor, the nascent transcript of the circular Corn-SAM sensor before processing for circularization and the circular Corn-SAM sensor.**

|                                                                  | Sequence                                                                                                                                                                                                                                                                                                                              |
|------------------------------------------------------------------|---------------------------------------------------------------------------------------------------------------------------------------------------------------------------------------------------------------------------------------------------------------------------------------------------------------------------------------|
| Linear Corn-SAM sensor<br>( 126 nt )                             | 5'-<br>GUGCUCGCUUCGGCAGCACAUAUACUAGUCGACCGCCAGA<br>UGCCUUGUAACCGAAAGGGUGAGGAAGGAGGUCUGAGGAG<br>GUCACUACGAAAGGAUGGGCGUCUAGAGCGGACUUCGGTCC<br>GCUUUU -3'                                                                                                                                                                                |
| Circular Corn-SAM<br>sensor<br>nascent transcript<br>( 285 nt )  | 5'-<br>GUGCUCGCUUCGGCAGCACAUAUACUAGUCGACGGGCCGC<br>ACUCGCCGGTCCCAAGCCCGGAUAAAUGGGAGGGGGCGG<br>GAAACCGCCUAACCAUGCCGAGTGCGGCCGCCGCGCCAGAUG<br>CCUUGUAACCGAAAGGGUGAGGAAGGAGGUCUGAGGAGGU<br>CACUACGAAAGGAUGGGCGGUGGCCGCGGUCGGCGUGGAC<br>UGUAGAACACUGCCAAUGCCGGUCCCAAGCCCGGAUAAA<br>GUGGAGGGUACAGUCCACGCUCUAGAGCGGACUUCGGUC<br>CGCUUUU -3' |
| Circular Corn-SAM<br>sensor<br>after self-cleavage<br>( 114 nt ) | 5'-<br>AACCAUGCCGAGTGCGGCCGCCGCGCCAGAUGCCUUGUAACC<br>GAAAGGGUGAGGAAGGAGGUCUGAGGAGGUCACUACGAAA<br>GGAUGGCCGGUGGCCGCGGUCGGCGUGGACUGUAG -3'                                                                                                                                                                                              |
| Circular Corn-SAM<br>sensor<br>after ligation                    | AACCAUGCCGAGTGCGGCCGCCGCGCCAGAUGCCUUGUAACC<br>GAAAGGGUGAGGAAGGAGGUCUGAGGAGGUCACUACGAAA<br>GGAUGGCCGGUGGCCGCGGUCGGCGUGGACUGUAG                                                                                                                                                                                                         |

**Table S2, related to Figures 1, 2, 3, S1, S2, S3A and S3B. DNA primers to prepare dsDNA templates for *in vitro* transcription.**

|  | Sequence (5' → 3') |
|--|--------------------|
|--|--------------------|

|                                                                  |                                                                         |
|------------------------------------------------------------------|-------------------------------------------------------------------------|
| Forward primer_Broccoli fused to circularly permuted SAM aptamer | CCATTAATACGACTCACTATAGGGCGCCAGATGCCTT<br>GTAACCGAAAGGGTGTCTCGA          |
| ssDNA template_Broccoli fused to circularly permuted SAM aptamer | GTAACCGAAAGGGTGTCTCGAGTAGAGTGTGGGCTCCTG<br>CCATCAGTCGGCTTCGGCCGA        |
| Reverse primer_Broccoli fused to circularly permuted SAM aptamer | CGCCATCCTTTTCGTGGACCCGACCGTCTCCTGCCATC<br>AGTCGGCCGAAGCCG               |
| Forward primer_Broccoli                                          | CCATTAATACGACTCACTATAGGGCGGCCGCGAGAC<br>GGTCCGGG                        |
| Reverse primer_Broccoli                                          | GCGGCCACGAGCCACACTCTACTCGACAGATACGAA<br>TATCTGGACCCGACCGTCTCGCG         |
| Forward primer_Corn-SAM sensor (Transducer 1)                    | CCATTAATACGACTCACTATAGGGCGCCAGATGCCTT<br>GTAACCGAAAGGG                  |
| Reverse primer_Corn-SAM sensor (Transducer 1)                    | CGCCATCCTTTTCGTGACCTCCTCAGACCTCCTTC<br>CTCGACCCTTTTCGGTTACAAGG          |
| Forward primer_Corn-SAM sensor (Transducer 2)                    | CCATTAATACGACTCACTATAGGGCGCCAGATGCCTT<br>GTAACCGAAAGGG                  |
| Reverse primer_Corn-SAM sensor (Transducer 2)                    | CGCCATCCTTTTCGTAGTGACCTCCTCAGACCTCCTTCC<br>TCACCCTTTTCGGTTACAAGGC       |
| Forward primer_Corn-SAM sensor (Transducer 3)                    | CCATTAATACGACTCACTATAGGGCGCCAGATGCCTT<br>GTAACCGAAAGGGCT                |
| Reverse primer_Corn-SAM sensor (Transducer 3)                    | CGCCATCCTTTTCGCTAGTGACCTCCTCAGACCTCCTTC<br>CTCAGCCCTTTTCGGTTACA         |
| Forward primer_Corn-SAM sensor (Transducer 4)                    | CCATTAATACGACTCACTATAGGGCGCCAGATGCCTT<br>GTAACCGAAAGGGCT                |
| Reverse primer_Corn-SAM sensor (Transducer 4)                    | CGCCATCCTTTTCGCTTAGTGACCTCCTCAGACCTCCTT<br>CCTCAAGCCCTTTTCGGTTACA       |
| Forward primer_Corn-SAM sensor (Transducer 5)                    | CCATTAATACGACTCACTATAGGGCGCCAGATGCCTT<br>GTAACCGAAAGGG                  |
| Reverse primer_Corn-SAM sensor (Transducer 5) (Figure 1D)        | CGCCATCCTTTTCGGGAAAGTGACCTCCTCAGACCTCC<br>TTCTCTTCCCCCTTTTCGGTTACAAGGC  |
| Forward primer_Corn-SAM sensor (Transducer 6) (Figure 1D)        | CCATTAATACGACTCACTATAGGGCGCCAGATGCCTT<br>GTAACCGAAAGGG                  |
| Reverse primer_Corn-SAM sensor (Transducer 6)                    | CGCCATCCTTTTCGGTTTAGTGACCTCCTCAGACCTCCT<br>TCCTCAAACCCCTTTTCGGTTACAAGGC |
| Forward primer_Corn-SAM sensor (Transducer 7)                    | CCATTAATACGACTCACTATAGGGCGCCAGATGCCTT<br>GTAACCGAAAGGG                  |
| Reverse primer_Corn-SAM sensor (Transducer 7)                    | CGCCATCCTTTTCGTTGTAGTGACCTCCTCAGACCTCCT<br>TCCTCAACACCCTTTTCGGTTACAAGGC |
| Forward primer_Corn-SAM sensor (Transducer 8)                    | CCATTAATACGACTCACTATAGGGCGCCAGATGCCTT<br>GTAACCGAAAGGG                  |
| Reverse primer_Corn-SAM sensor (Transducer 8)                    | CGCCATCCTTTTCGAGGAAAGTGACCTCCTCAGACCTC<br>CTTCTCTTCCCTTTTCGGTTACAAGGC   |
| Forward primer_Corn-SAM sensor (Transducer 9)                    | CCATTAATACGACTCACTATAGGGCGCCAGATGCCTT<br>GTAACCGAAAGGG                  |

|                                                                            |                                                                       |
|----------------------------------------------------------------------------|-----------------------------------------------------------------------|
| Reverse primer_Corn-SAM sensor (Transducer 9)                              | CGCCATCCTTTTGAAGGAAAGTGACCTCCTCAGACCT<br>CCTTCCTCTTCCCTTTCCGTTACAAGGC |
| Forward primer_Corn-cdiGMP sensor_2 <sup>nd</sup> round PCR                | CCATTAATACGACTCACTATAGGGTGGTAGGTAGCGG<br>GGTTAC                       |
| Reverse primer_Corn-cdiGMP sensor_2 <sup>nd</sup> round PCR                | TGGTTTAGGCCGGAGGCTTTGCGTCCCCTCTTTTGA<br>ATGGTTTGCCCTGTG               |
| Forward primer_Corn-cdiGMP sensor (Transducer 1)_1 <sup>st</sup> round PCR | GTGGTAGGTAGCGGGGTTACGGAAGAGGAAGGAGGT<br>CTGAGGAGGTCACT                |
| Reverse primer_Corn-cdiGMP sensor (Transducer 1)_1 <sup>st</sup> round PCR | TCGAATGGTTTGCCCTGTGGGAAAGTGACCTCCTCAG<br>ACCTCC                       |
| Forward primer_Corn-cdiGMP sensor (Transducer 2)_1 <sup>st</sup> round PCR | GTGGTAGGTAGCGGGGTTACCGATGGAGGAAGGAGG<br>TCTGAGGAGGTCACT               |
| Reverse primer_Corn-cdiGMP sensor (Transducer 2)_1 <sup>st</sup> round PCR | TCGAATGGTTTGCCCTGTGCGTGAGTGACCTCCTCAG<br>ACCTCC                       |
| Forward primer_Corn-cdiGMP sensor (Transducer 3)_1 <sup>st</sup> round PCR | GTGGTAGGTAGCGGGGTTACCGATTGAGGAAGGAGGT<br>CTGAGGAGGTCACT               |
| Reverse primer_Corn-cdiGMP sensor (Transducer 3)_1 <sup>st</sup> round PCR | TCGAATGGTTTGCCCTGTGCGTTAGTGACCTCCTCAGA<br>CCTCC                       |
| Forward primer_Corn-cdiGMP sensor (Transducer 4)_1 <sup>st</sup> round PCR | GTGGTAGGTAGCGGGGTTACCGAGTGAGGAAGGAGG<br>TCTGAGGAGGTCACT               |
| Forward primer_Corn-cdiGMP sensor (Transducer 4)_1 <sup>st</sup> round PCR | TCGAATGGTTTGCCCTGTGCGGTAGTGACCTCCTCAG<br>ACCTCC                       |
| Forward primer_Corn-SAH sensor_2 <sup>nd</sup> round PCR                   | CCATTAATACGACTCACTATAGGGCTCGCCGAGGAGC<br>GCTGCAA                      |
| Reverse primer_Corn-SAH sensor_2 <sup>nd</sup> round PCR                   | CTGAACCGAGCGCCG                                                       |
| Forward primer_Corn-SAH sensor (Transducer 1)_1 <sup>st</sup> round PCR    | CCGAGGAGCGCTGCAACAGGAAGAGGAAGGAGGTCT<br>GAGGAGGTCACTTTCTGCCAGGC       |
| Reverse primer_Corn-SAH sensor (Transducer 1)_1 <sup>st</sup> round PCR    | CTGAACCGAGCGCCGTTGGTTTAAAGGTCCCGATAAT<br>CGCCGAGCCTGGCAGGAAAGTGA      |
| Forward primer_Corn-SAH sensor (Transducer 2)_1 <sup>st</sup> round PCR    | CGAGGAGCGCTGCAAAGGAAGAGGAAGGAGGTCTGA<br>GGAGGTCACTTTCTCCAGGCTCG       |
| Reverse primer_Corn-SAH sensor (Transducer 2)_1 <sup>st</sup> round PCR    | CTGAACCGAGCGCCGTTGGTTTAAAGGTCCCGATAAT<br>CGCCGAGCCTGGAGGAAAGTGAC      |
| Forward primer_Corn-SAH sensor (Transducer 3)_1 <sup>st</sup> round PCR    | CCGAGGAGCGCTGCAAGGAAGAGGAAGGAGGTCTGA<br>GGAGGTCACTTTCCCCAGGCTCGG      |

|                                                                         |                                                                      |
|-------------------------------------------------------------------------|----------------------------------------------------------------------|
| Reverse primer_Corn-SAH sensor (Transducer 3)_1 <sup>st</sup> round PCR | CTGAACCGAGCGCCGTTGGTTTAAAGGTCCCGATAAT<br>CGCCGAGCCTGGGGAAAGTG        |
| Forward primer_Corn-SAH sensor (Transducer 4)_1 <sup>st</sup> round PCR | CCGAGGAGCGCTGCAACGGAAGAGGAAGGAGGTCTG<br>AGGAGGTCACCTTTCCGCCAGGCTC    |
| Reverse primer_Corn-SAH sensor (Transducer 4)_1 <sup>st</sup> round PCR | CTGAACCGAGCGCCGTTGGTTTAAAGGTCCCGATAAT<br>CGCCGAGCCTGGCGGAAAGTGAC     |
| Forward primer_Corn-SAH sensor (Transducer 5)_1 <sup>st</sup> round PCR | CCGAGGAGCGCTGCAAGGTAAGAGGAAGGAGGTCTG<br>AGGAGGTCACCTTTACCCAGGCTC     |
| Reverse primer_Corn-SAH sensor (Transducer 5)_1 <sup>st</sup> round PCR | TGAACCGAGCGCCGTTGGTTTAAAGGTCCCGATAATC<br>GCCGAGCCTGGGGTAAAGTGACC     |
| Forward primer_tRNA-Corn                                                | <b>CCATTAATACGACTCACTATAGGGGCCCGGATAGCTC</b><br>AGTCGGTAGAGCAGCGGCCG |
| tRNA-Corn template from pAV-tCorn (Song et al., 2017)                   | GAGCAGCGGCCGCGAGGAAGGAGGTCTGAGGAGGTC<br>ACTGCGGCCGCGGGTCCAG          |
| Reverse primer_tRNA-Corn                                                | TGGCGCCCGAACAGGGACTTGAACCCTGGACCCGCG<br>GC                           |

\*The bold DNA sequences indicate the T7 promoter region.

**Table S3, related to Figures 4, S3 and S4. DNA primers to prepare dsDNA templates for cloning.**

|                                                               | Sequence (5' → 3')                                                             |
|---------------------------------------------------------------|--------------------------------------------------------------------------------|
| Forward primer_Corn-SAM sensor in pAV-Tornado-Corn-SAM sensor | AATCAT <u>GCGGCCG</u> CCGCCAGATGCCTTGTAAACCG                                   |
| Reverse primer_Corn-SAM sensor in pAV-Tornado-Corn-SAM sensor | GTAATT <u>CCGCGGCC</u> ACCGCCATCCTTTCCGGAAAGTG                                 |
| Forward primer_Corn-SAM sensor in pAV-Corn-SAM sensor         | AATCTAG <u>TCGAC</u> CGCCAGATGCCTTGTAAAC                                       |
| Reverse primer_Corn-SAM sensor in pAV-Corn-SAM sensor         | AACAAT <u>TCTAGAC</u> CGCCATCCTTTCCGG                                          |
| DNA Template_Corn SAM sensor                                  | CGCCAGATGCCTTGTAAACCGAAAGGGGGAAGAGGAAG<br>GAGGTCTGAGGAGGTCACTTTCCCGAAAGGATGGCG |

\*DNA sequences in italic and underlined indicate restriction enzyme sites.
